# Supplementary material for: Potential Uranium Migration within the Geochemical Gradient of the Opalinus Clay System at the Mont Terri
Source: MDPI journal article supplement (doi:10.3390/min11101087), 2021-10-03
Supplement: s1 [file s1]

## Supplementary material

### Potential Uranium Migration Within the Geochemical Gradient of the Opalinus Clay System at the Mont Terri

Theresa Hennig<sup>a,b,\*</sup> and Michael Kühn<sup>a,b</sup>

<sup>a</sup> GFZ German Research Centre for Geosciences, Fluid Systems Modelling,  
Telegrafenberg, 14473 Potsdam, Germany

<sup>b</sup> University of Potsdam, Institute of Geosciences,  
Karl-Liebknecht-Str. 24-25, 14476 Potsdam-Golm, Germany

\* Corresponding author: [theresa.hennig@gfz-potsdam.de](mailto:theresa.hennig@gfz-potsdam.de), Phone: +49 331 288-28723

## Supplementary material S1

**Table S1.** Summary of the pore water components used for model calibration. Concentrations are given as averaged values from borehole analyses at the underground laboratory Mont Terri (Switzerland).

| Parameter<br>& Unit           | Borehole | BK <sup>a</sup>     | BWS-A3 <sup>a,b</sup> | BWS-A2 <sup>a</sup> | BGP-1 <sup>a</sup>      | BWS-A1 <sup>a,b</sup> | BPC-C1 <sup>c</sup> | E6 <sup>a</sup>     | JM <sup>a</sup>     | G2 <sup>a</sup>      |
|-------------------------------|----------|---------------------|-----------------------|---------------------|-------------------------|-----------------------|---------------------|---------------------|---------------------|----------------------|
|                               |          | (Dogger<br>aquifer) | (OPA<br>sandy)        | (OPA<br>sandy)      | (OPA<br>carbonate-rich) | (OPA<br>shaly)        | (OPA<br>shaly)      | (Liassic<br>shales) | (Liassic<br>shales) | (Liassic<br>aquifer) |
| pH                            | -        | 7.38                | 7.39                  | 7.55                | 7.28                    | 7.49                  | 7.13                | 7.78                | 7.96                | 7.44                 |
| Na <sup>+</sup>               | mmol/L   | 0.83                | 121                   | 197                 | 195                     | 230                   | 276                 | 281                 | 43.8                | 1.29                 |
| K <sup>+</sup>                | mmol/L   | 0.38                | 0.87                  | 1.14                | 0.73                    | 1.47                  | 1.93                | 1.28                | 0.29                | 0.11                 |
| Mg <sup>2+</sup>              | mmol/L   | 2.65                | 5.91                  | 11.01               | 15.89                   | 16.79                 | 21.97               | 24.71               | 0.71                | 0.67                 |
| Ca <sup>2+</sup>              | mmol/L   | 1.99                | 6.73                  | 8.23                | 16.37                   | 16.03                 | 18.91               | 19.28               | 0.69                | 2.09                 |
| Sr <sup>2+</sup>              | mmol/L   | 0.23                | 0.35                  | 0.42                | 0.44                    | 0.47                  | 0.46                | 0.35                | 0.05                | 0.03                 |
| Fe <sub>total</sub>           | μmol/L   | 1.27                | 9.81                  | 10.57               | n.a.                    | 8.37 <sup>c</sup>     | 29.62               | n.a.                | 0.23                | n.a.                 |
| Cl <sup>-</sup>               | mmol/L   | 0.09                | 121                   | 321                 | 242                     | 273                   | 327                 | 321                 | 22.19               | 0.18                 |
| SO <sub>4</sub> <sup>2-</sup> | mmol/L   | 0.97                | 6.94                  | 15.34               | 16.03                   | 12.29                 | 16.79               | 15.63               | 3.01                | 0.49                 |
| U <sub>total</sub>            | nmol/L   | 1.22                | 2.52                  | 0.63                | n.a.                    | 2.28 <sup>c</sup>     | n.a.                | n.a.                | 0.04                | n.a.                 |
| pCO <sub>2</sub>              | bar      | 10 <sup>-1.7</sup>  | 10 <sup>-2.3</sup>    | 10 <sup>-2.2</sup>  | 10 <sup>-2.4</sup>      | 10 <sup>-2.8</sup>    | 10 <sup>-1.9</sup>  | 10 <sup>-2.5</sup>  | 10 <sup>-2.3</sup>  | 10 <sup>-1.9</sup>   |
| I <sup>d</sup>                | mol/L    | 0.02                | 0.16                  | 0.23                | 0.28                    | 0.32                  | 0.38                | 0.39                | 0.05                | 0.01                 |
| Distance <sup>e</sup>         | m        | 0                   | 50                    | 65                  | 85                      | 105                   | 135                 | 165                 | 176                 | 210                  |

n.a. = no data available; OPA = Opalinus Clay; <sup>a</sup> Data from Pearson et al. [1]; <sup>b</sup> Data from Wersin et al. [2]; <sup>c</sup> Data from Vinsot et al. [3]; <sup>d</sup> calculated in PHREEQC; <sup>e</sup> Distance from contact between Dogger limestone and Opalinus Clay

## Supplementary material S2

The solubility of calcium increases in solutions containing magnesium compared to the pure mineral due to the exchange of calcium with magnesium ions on the surface of the calcite lattice [4]. Therefore, the stability constant of calcite given in the PSI/Nagra thermodynamic database Version 12/07 [5]:

Calcite (pure)

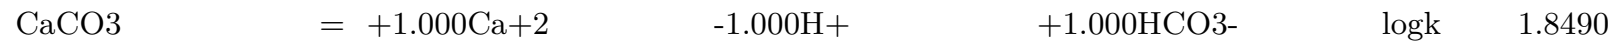

is adapted based on the  $\text{Mg}^{2+}/\text{Ca}^{2+}$  ratio in the pore waters of the Opalinus Clay formation at Mont Russelin representing old chemical signatures [6,7]. According to the approach presented in Möller and De Lucia [4], the new stability constant for calcite is about 0.2 log units higher:

MgCalcite

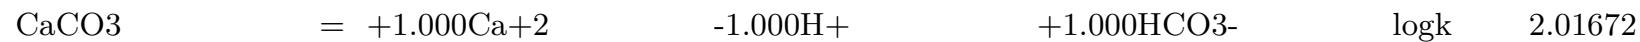

Supplementary  
material S3

**Figure S3.**

Concentration profiles of  
pore water components  
used for model  
calibration. The data  
stems from borehole  
analysis at the  
underground laboratory  
Mont Terri. The y-axis is  
the distance perpendicular  
to the contact between  
Opalinus Clay and  
Dogger limestones.

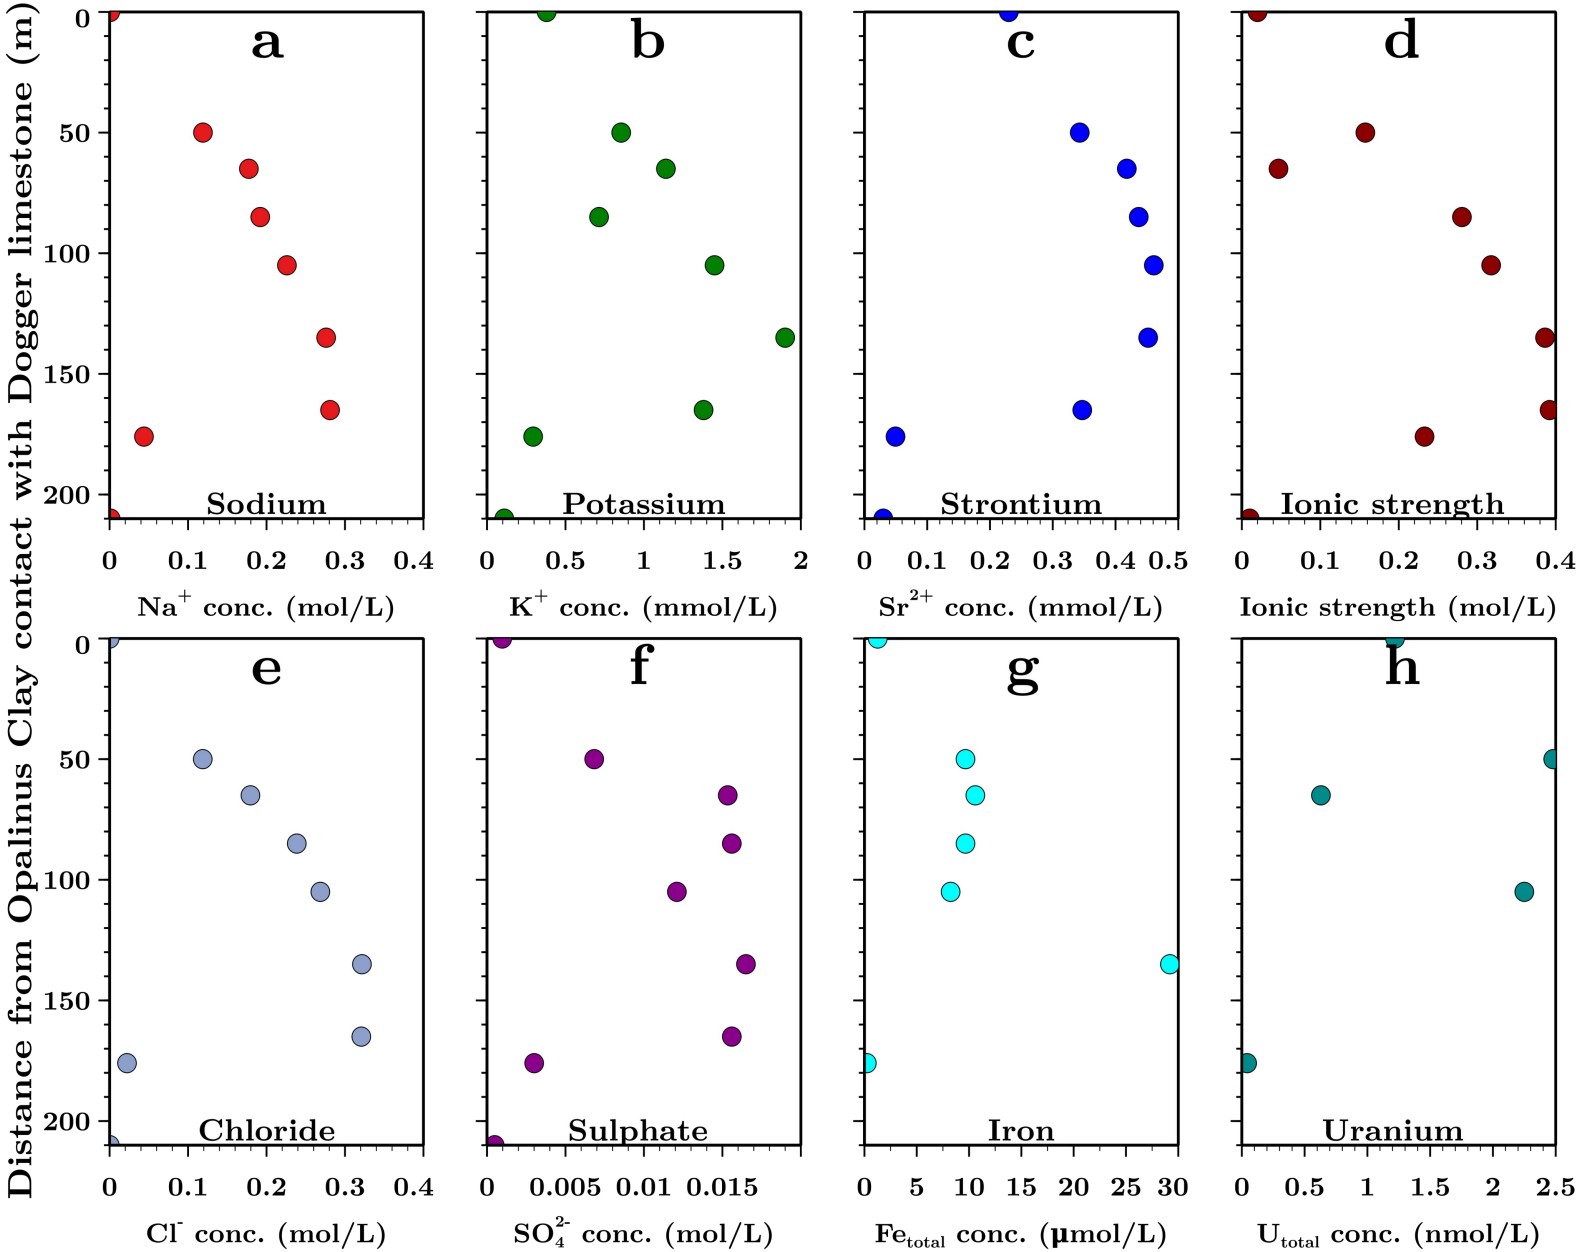

○ Data from Pearson et al. [1]

Supplementary  
material S4

**Figure S4.**

Modelled concentration profiles of SC simulations coincide with measured data using initial pore water composition according to scenario 1R. With MC diffusion, transport towards the embedding aquifers is decreased leading to higher concentrations, especially for sulphate and iron.

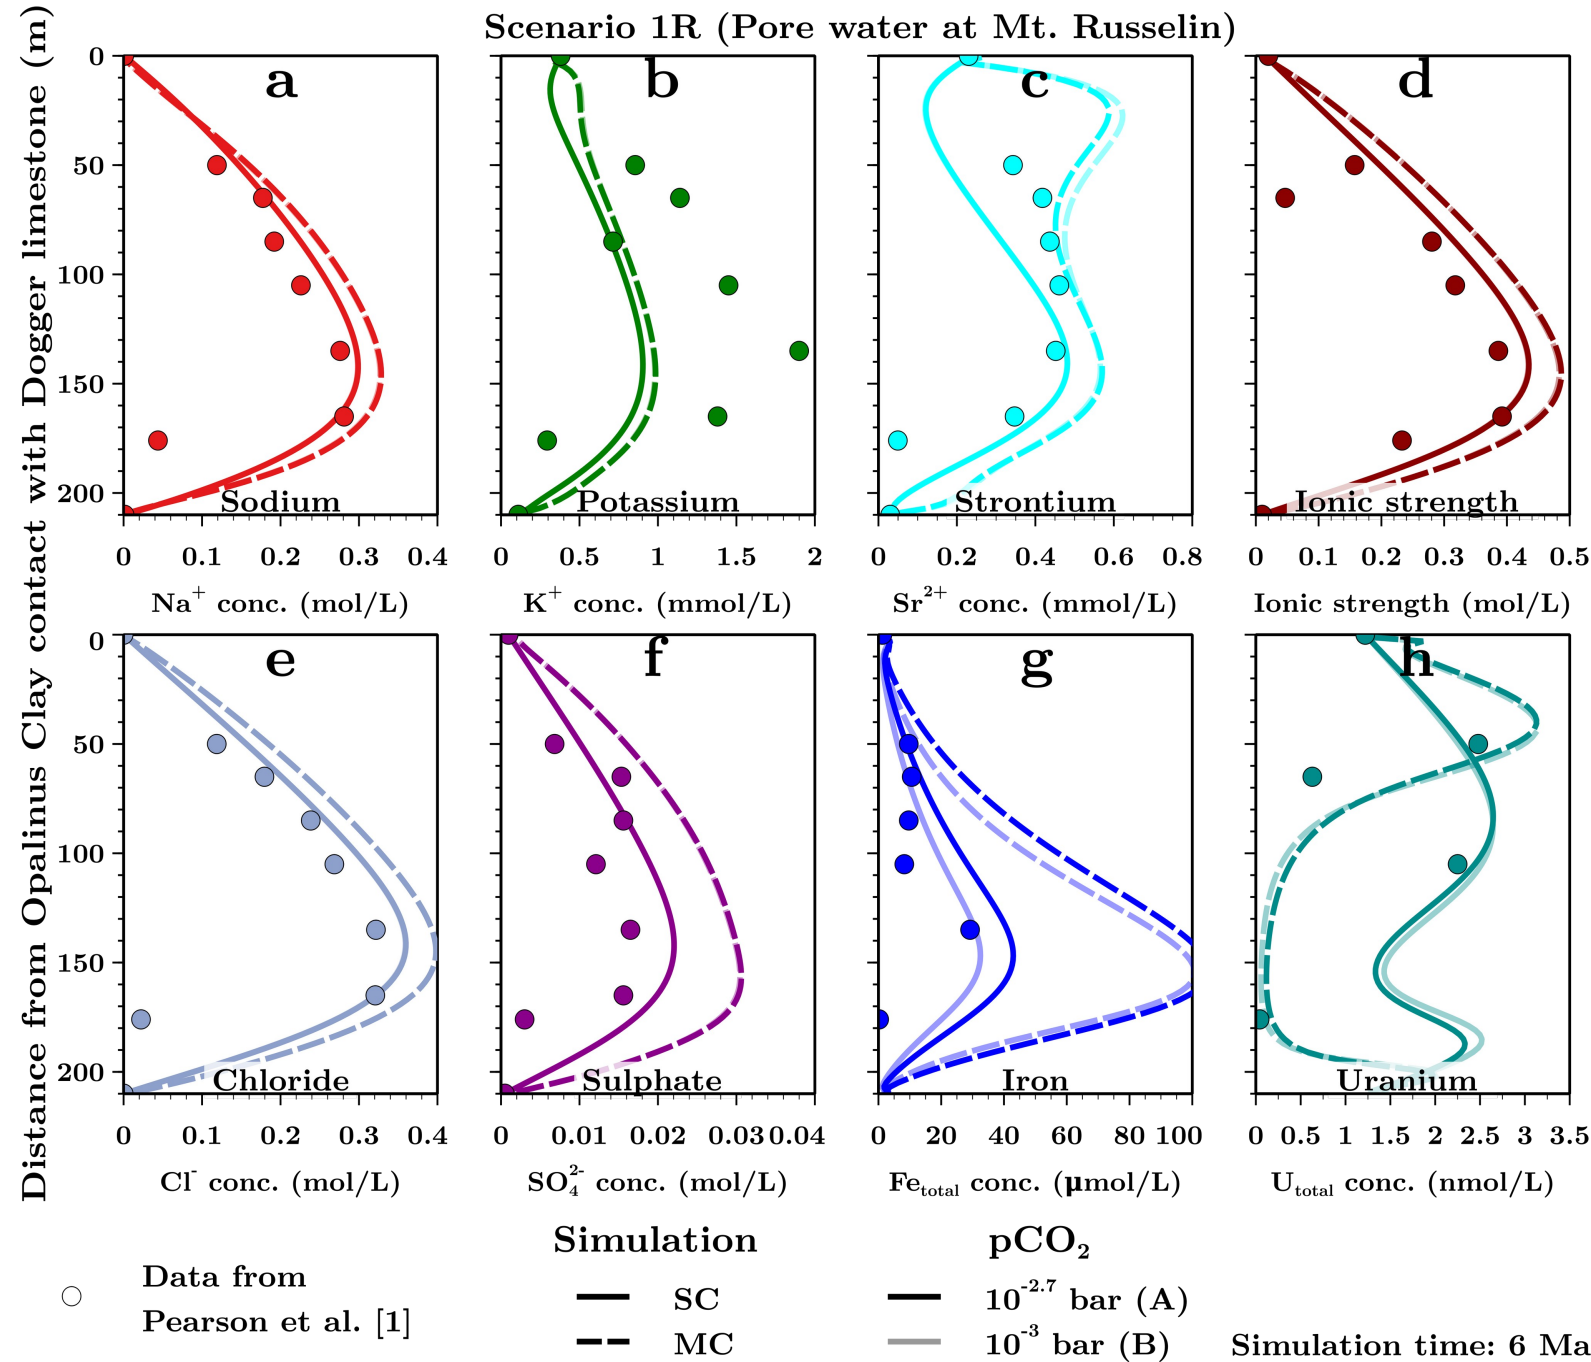

Supplementary  
material S5

**Figure S5.**

Modelled concentration profiles of SC simulations coincide with measured data using initial pore water composition according to scenario 2J, except for potassium and sulphate. With MC diffusion, transport towards the embedding aquifers is decreased leading to higher concentrations, especially for potassium and iron.

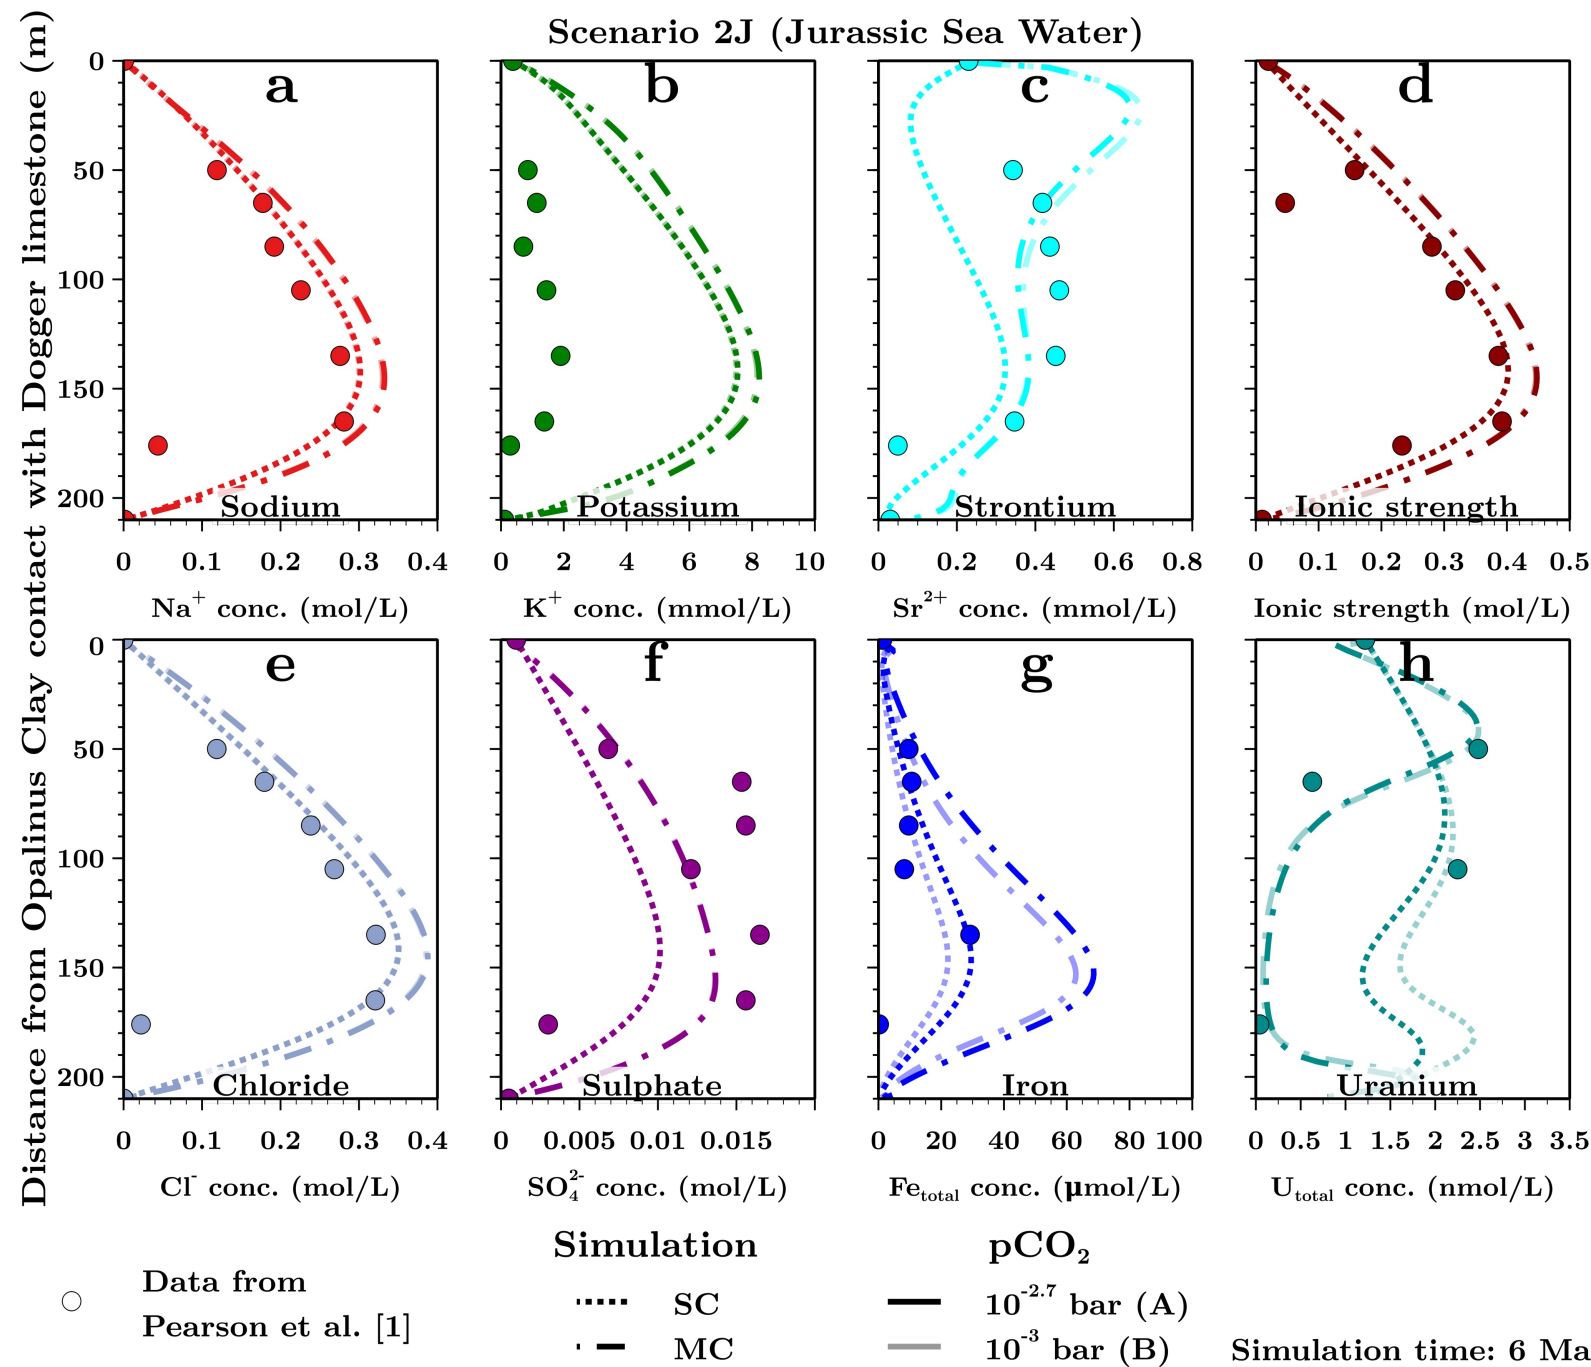

## References

1. Pearson, F. J., Arcos, D., Bath, A., Boisson, J.-Y., Fernández, A. M., Gäbler, H. E., Gaucher, E. C., Gautschi, A., Griffault, L., Hernán, P., and Waber, H. N. (2003). Mont Terri Project – Geochemistry of water in the Opalinus Clay formation at the Mont Terri rock laboratory. Technical Report 5, Federal Office for Water and Geology, FOWG, Bern, Switzerland.
2. Wersin, P., Gaucher, E. C., Gimmi, T., Leupin, O. X., Mäder, U. K., Pearson, F. J., Thoenen, T., and Tournassat, C. (2009). Geochemistry of porewaters in Opalinus Clay at Mont Terri: experimental data and modelling. Mont Terri Project, Technical Report, TR 2008-06.
3. Vinsot, A., Appelo, C. A. J., Cailteau, C., Wechner, S., Pironon, J., De Donato, P., De Cannière, P., Mettler, S., Wersin, P., and Gäbler, H. E. (2008). CO<sub>2</sub> data on gas and pore water sampled in situ in the Opalinus Clay at the Mont Terri rock laboratory. *Physics and Chemistry of the Earth*, 33(SUPPL. 1):54–60.
4. Möller, P.; De Lucia, M. The impact of Mg<sup>2+</sup> ions on equilibration of Mg-Ca carbonates in groundwater and brines. *Geochemistry* 2020, 80, 125611. doi:10.1016/j.chemer.2020.125611.
5. Thoenen, T., Hummel, W., Berner, U., and Curti, E. (2014). The PSI/Nagra Chemical Thermodynamic Database 12/07. Technical report, Paul Scherrer Institute (PSI), Villigen, Switzerland.
6. Koroleva, M.; Mazurek, M. Natural Tracer Profile Mont Russelin (NT) Experiment: Natural tracer profiles in the Mont Russelin anticline. Mont Terri Project, Technical Note 2009, 2006-24.
7. Mazurek, M.; Alt-Epping, P.; Bath, A.; Gimmi, T.; Niklaus Waber, H.; Buschaert, S.; Cannière, P.D.; Craen, M.D.; Gautschi, A.; Savoye, S.; Vinsot, A.; Wemaere, I.; Wouters, L. Natural tracer profiles across argillaceous formations. *Applied Geochemistry* 2011, 26, 1035–1064. doi:10.1016/j.apgeochem.2011.03.124.
